# Supplementary material for: Energy restriction and Roux-en-Y gastric bypass reduce postprandial α-dicarbonyl stress in obese women with type 2 diabetes
Source: Springer Nature journal article supplement (doi:10.1007/s00125-016-4009-1), 2016-06-16
Supplement: MOESM1 [file 10267142]

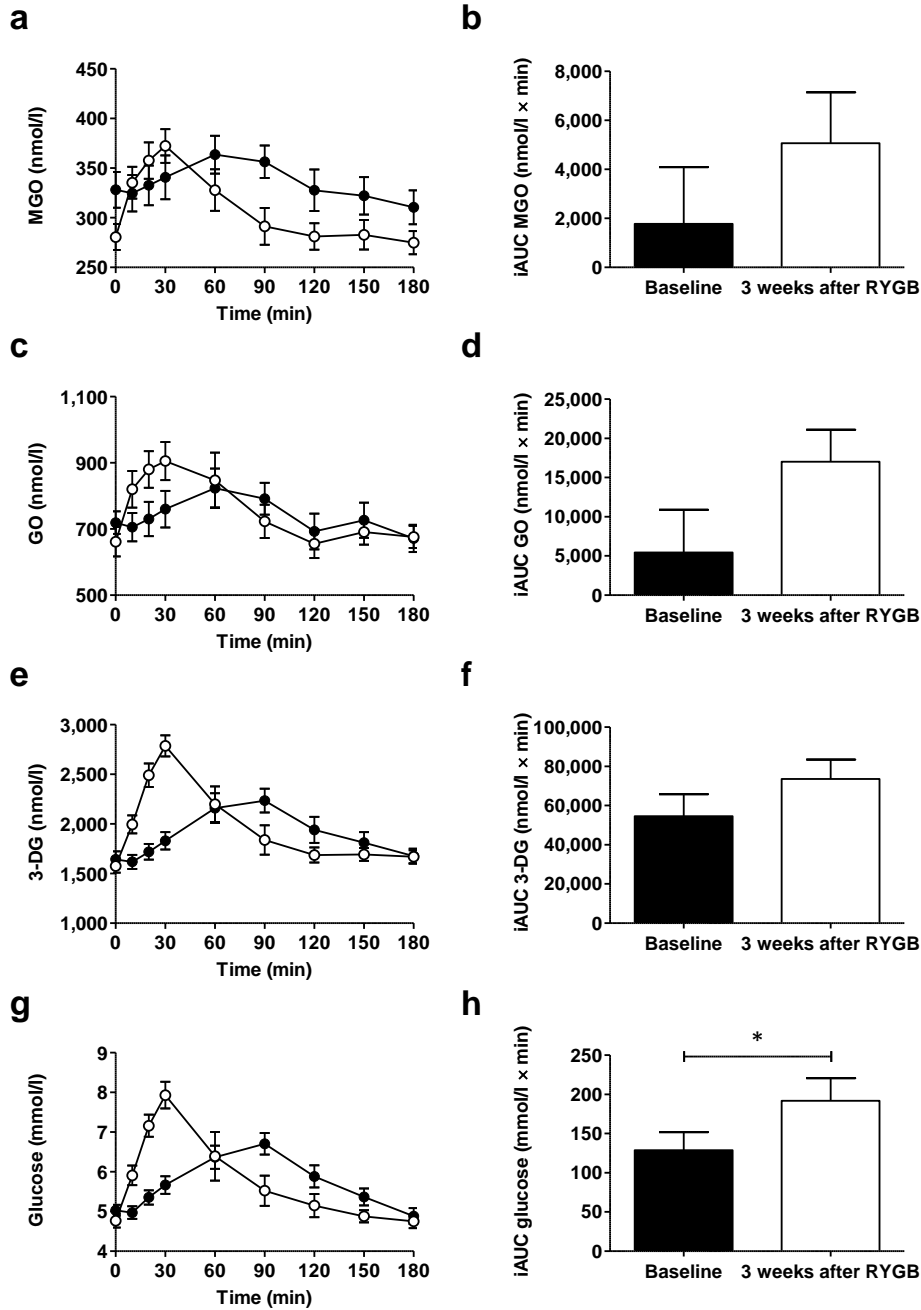

**ESM Fig. 1** Plasma levels of  $\alpha$ -dicarbonyls and glucose in obese NGT individuals three weeks after Roux-en-Y gastric bypass. Plasma levels during the MMT of a) MGO, c) GO, e) 3-DG and g) glucose. iAUC as calculated from the MMT of b) MGO, d) GO, f) 3-DG and h) glucose. Data are shown as means (SEM). Black circles, obese NGT individuals before RYGB; open circles, obese NGT individuals three weeks after RYGB,  $n=16$ . Differences in the iAUCs of MGO, GO, 3-DG and glucose were tested with paired two-sided samples  $t$  tests
