# Supplementary material for: Energy restriction and Roux-en-Y gastric bypass reduce postprandial α-dicarbonyl stress in obese women with type 2 diabetes
Source: Springer Nature journal article supplement (doi:10.1007/s00125-016-4009-1), 2016-06-16
Supplement: MOESM4 [file 10267142]

**ESM Table 1** Plasma levels of fasting and postprandial  $\alpha$ -dicarbonyl levels at baseline without and with adjustment for glucose

|                              | Unadjusted means              | Adjusted means (adjusted for glucose) |
|------------------------------|-------------------------------|---------------------------------------|
| <b>Fasting MGO (nmol/l)</b>  |                               |                                       |
| Lean                         | 262 ± 15                      | 290 ± 19                              |
| Obese NGT                    | 322 ± 12*                     | 346 ± 14*                             |
| Obese T2DM                   | 381 ± 16 <sup>††</sup>        | 344 ± 16                              |
| <b>Fasting GO (nmol/l)</b>   |                               |                                       |
| Lean                         | 645 ± 46                      | 729 ± 60                              |
| Obese NGT                    | 707 ± 25                      | 777 ± 42                              |
| Obese T2DM                   | 937 ± 52 <sup>†††</sup>       | 829 ± 48                              |
| <b>Fasting 3-DG (nmol/l)</b> |                               |                                       |
| Lean                         | 1531 ± 53                     | 2061 ± 81                             |
| Obese NGT                    | 1620 ± 61                     | 2063 ± 57                             |
| Obese T2DM                   | 2926 ± 159 <sup>†††</sup>     | 2247 ± 65                             |
| <b>iAUC MGO</b>              |                               |                                       |
| Lean                         | 795 ± 3487                    | 2057 ± 2718                           |
| Obese NGT                    | 823 ± 1424                    | 1542 ± 1673                           |
| Obese T2DM                   | 7963 ± 1571 <sup>††</sup>     | 6759 ± 1795                           |
| <b>iAUC GO</b>               |                               |                                       |
| Lean                         | 3211 ± 7872                   | 6500 ± 10170                          |
| Obese NGT                    | 9006 ± 3368                   | 10925 ± 6270                          |
| Obese T2DM                   | 18837 ± 7809                  | 15771 ± 6601                          |
| <b>iAUC 3-DG</b>             |                               |                                       |
| Lean                         | 24434 ± 15607                 | 39639 ± 15229                         |
| Obese NGT                    | 51074 ± 7604                  | 59945 ± 9389                          |
| Obese T2DM                   | 123027 ± 10922 <sup>†††</sup> | 108853 ± 9884                         |

Lean,  $n=12$ ; obese NGT,  $n=27$ ; obese type 2 diabetes,  $n=27$ . Data are presented as unadjusted and adjusted means (SEM). Without correction for glucose, differences between the groups were tested with one-way ANOVA with Bonferroni correction. To compare the groups after adjustment for glucose, one-way ANCOVA with Bonferroni correction was used. \* $p<0.05$  for lean vs obese NGT individuals. <sup>††</sup> $p<0.01$  and <sup>†††</sup> $p<0.001$  for obese NGT vs. obese type 2 diabetes individuals
